# Supplementary material
Source: HighWire-hosted journal article supplement (http://www.cmaj.ca/highwire/filestream/58724/field_highwire_adjunct_files/0/case-kekre-1-at.pdf)

**Appendix 1:** The tumour extended into the portal vein (arrow).

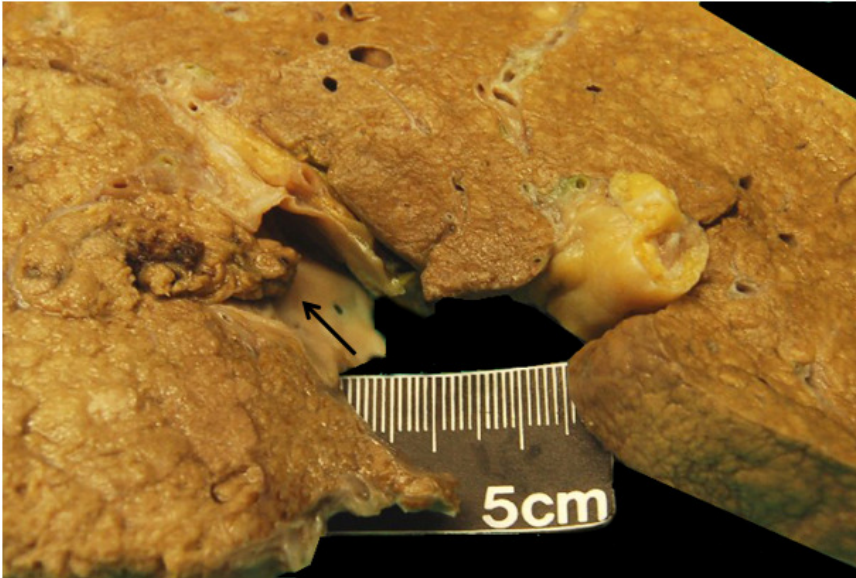

Supplement: case-kekre-1-at.pdf [file case-kekre-1-at.pdf]
